# Supplementary material
Source: PubMed Central journal article supplement (PMC2953043)
Supplement: supp_30_21_5245__2.pdf [file supp_30_21_5245__2.pdf]

**Supplemental Table I: Yeast strains used in this study.**

| Strain  | Genotype                                                                                                                                                       |
|---------|----------------------------------------------------------------------------------------------------------------------------------------------------------------|
| MYY61   | <i>MATa, ade2-1, leu2-3, can1-100, trp1-1, ura3-52, his3-11,15, Brr2-13myc::KANMX6, hmt1::HIS3</i>                                                             |
| MYY92   | <i>MATa, ade2-1, leu2-3, can1-100, trp1-1, ura3-52, his3-11,15, Brr2-13myc::KANMX6,</i>                                                                        |
| MYY72   | <i>MATa, ade2-1, leu2-3, can1-100, trp1-1, ura3-52, his3-11,15, Prp11-9myc::TRP1, hmt1::HIS3</i>                                                               |
| MYY79   | <i>MATa, ade2-1, leu2-3, can1-100, trp1-1, ura3-52, his3-11,15, Mud2-13myc::KANMX6, hmt1::HIS3</i>                                                             |
| MYY90   | <i>MATa, ade2-1, leu2-3, can1-100, trp1-1, ura3-52, his3-11,15, Prp2-9myc::TRP1</i>                                                                            |
| MYY104  | <i>MATa, ade2-1, leu2-3, can1-100, trp1-1, ura3-52, his3-11,15, Prp2-9myc::TRP1, hmt1::HIS3</i>                                                                |
| MYY379  | <i>MATa, ade2-1, leu2-3, can1-100, trp1-1, ura3-52, his3-11,15, Prp5-9myc::TRP1</i>                                                                            |
| MYY386  | <i>MATa, ade2-1, leu2-3, can1-100, trp1-1, ura3-52, his3-11,15, Prp5-9myc::TRP1, hmt1::HIS3</i>                                                                |
| MYY389  | <i>MATa, ade2-1, leu2-3, can1-100, trp1-1, ura3-52, his3-11,15, Prp40-9myc::TRP1, hmt1::KANMX6</i>                                                             |
| MYY477  | <i>MATa, his3<math>\Delta</math>1, leu2<math>\Delta</math>0, met15<math>\Delta</math>0, ura3<math>\Delta</math>0, SNP1-TAP::HIS3</i>                           |
| MYY478  | <i>MATa, his3<math>\Delta</math>1, leu2<math>\Delta</math>0, met15<math>\Delta</math>0, ura3<math>\Delta</math>0, SNP1-GFP::HIS3</i>                           |
| MYY496  | <i>MATa, ade2-1, leu2-3, can1-100, trp1-1, ura3-52, his3-11,15, Prp11-9myc::TRP1, hmt1-G68R::HIS3::LEU2</i>                                                    |
| MYY498  | <i>MATa, ade2-1, leu2-3, can1-100, trp1-1, ura3-52, his3-11,15, Mud2-13myc::KANMX6, hmt1-G68R::HIS3::LEU2</i>                                                  |
| MYY512  | <i>MATa, his3<math>\Delta</math>1, leu2<math>\Delta</math>0, met15<math>\Delta</math>0, ura3<math>\Delta</math>0, SNP1-GFP::HIS3, hmt1::KANMX6</i>             |
| MYY514  | <i>MATa, ade2-1, leu2-3, can1-100, trp1-1, ura3-52, his3-11,15, SNP1-9myc::TRP1</i>                                                                            |
| MYY554  | <i>MATa, his3<math>\Delta</math>1, leu2<math>\Delta</math>0, met15<math>\Delta</math>0, ura3<math>\Delta</math>0, SNP1-TAP::HIS3, hmt1::KANMX6</i>             |
| MYY580  | <i>MATa, his3<math>\Delta</math>1, leu2<math>\Delta</math>0, met15<math>\Delta</math>0, ura3<math>\Delta</math>0, SNP1-TAP::HIS3, hmt1- G68R::KANMX6::LEU2</i> |
| MYY582  | <i>MATa,ade2-1, leu2-3, can1-100, trp1-1, ura3-52, his3-11,15, SNP1-9myc::TRP1, hmt1::KANMX6</i>                                                               |
| PSY3347 | <i>MATa, ade2-1, leu2-3, can1-100, trp1-1, ura3-52, his3-11,15, Prp40-9myc::TRP1</i>                                                                           |

**Supplemental Table 2: Oligonucleotides used in this study.**

| <u>Name</u> | <u>Description</u>     | <u>Sequence</u>              |
|-------------|------------------------|------------------------------|
| MCY978      | <i>RPS13</i> ChIP FWD  | TGCTCCAGCTTGGTTCAAGTTGTC     |
| MCY979      | <i>RPS13</i> ChIP REV  | TTGGGTAACACCGTGAGCATCTCT     |
| MCY994      | <i>ARP9</i> ChIP FWD   | GGCTCCATTTAGGCAGGACAGTAT     |
| MCY995      | <i>ARP9</i> ChIP REV   | AACCATCTTGTCTCGTGGTCCGAT     |
| MCY998      | <i>HOP2</i> ChIP FWD   | AGAAATCAAACGATAGAGCCATTCAGG  |
| MCY999      | <i>HOP2</i> ChIP REV   | GTTCTTTAGTTACAGAGTCAAGAGCGTC |
| MCY1016     | <i>REC107</i> ChIP FWD | ACTGGAATGGGCAGGTAAACTGGA     |
| MCY1017     | <i>REC107</i> ChIP REV | ACTTGAGGGTATGCACTGTGTTGG     |
